# Supplementary material for: A Gut-Ex-Vivo System to Study Gut Inflammation Associated to Inflammatory Bowel Disease (IBD)
Source: MDPI journal article supplement (doi:10.3390/biology10070605), 2021-06-30
Supplement: s1 [file s1]

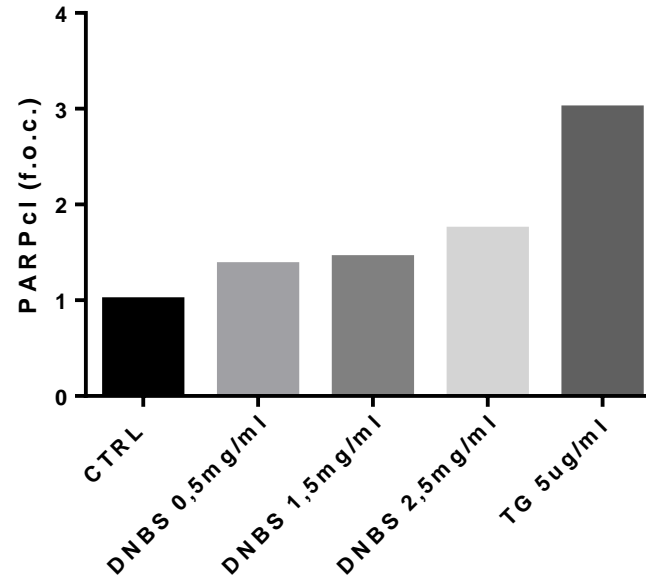

### **Supplementary S1. Tissue damage.**

Densitometric analysis of cleaved PARP (PARPcle) western blotting reported in Figure 5F. PARPcle expression was normalized using Tubulin as loading control. Data are reported as fold over control (f.o.c.).
