# Supplementary material for: A Gut-Ex-Vivo System to Study Gut Inflammation Associated to Inflammatory Bowel Disease (IBD)
Source: MDPI journal article supplement (doi:10.3390/biology10070605), 2021-06-30
Supplement: s1 [file s1]

**Supplementary Table1. Primers sequence.**

| Primer          | Sequence               |
|-----------------|------------------------|
| TNF $\alpha$ _F | CCTCCCTCTCATCAGTTCTAT  |
| TNF $\alpha$ _R | ACTTGGTGGTTTGCTACG     |
| IL10_F          | TGAATTCCCTGGGTGAGA     |
| IL10_R          | CCACTGCCCTTGCTCTTATT   |
| IL1 $\beta$ _F  | GGACCCATATGAGCTGAAAG   |
| IL1 $\beta$ _R  | TGTCGTTGCTTGGTTCTC     |
| IL6_F           | GAGGAGACTTCACAGAGGATA  |
| IL6_R           | ATTTCCACGATTTCCCAGAG   |
| IL15_F          | CAGCAAGGACCATGAAGA     |
| IL15_R          | GGCTGAGTTCCACATCTAAC   |
| IL17A_F         | CGCAATGAAGACCCTGATAG   |
| IL17A_R         | CTTGCTGGATGAGAACAGAA   |
| INF $\gamma$ _F | CCACATCTATGCCACTTGAG   |
| INF $\gamma$ _R | CTCTTCCTCATGGCTGTTTC   |
| ATF4_F          | GTTTAGAGCTAGGCAGTGAAG  |
| ATF4_R          | CCTTTACACATGGAGGGATTAG |
| ATF6_F          | GATGGTGACAACCAGAAAGA   |
| ATF6_R          | TGGAGGTGGAGGCATATAA    |
| XBP1s_F         | AGTCCGCAGCAGGTG        |
| XBP1s_R         | GGTCCAACCTGTCCAGAATG   |
| TG2_F           | AAGAGCGAAGGGACATACT    |
| TG2_R           | TGAGCACAGACCCATCTT     |
| CLD15_F         | GGGACCCTCCACATACTT     |
| CLD15_R         | CATACTTGGTTCCAGCATACA  |
| CLD2_F          | CCTCGCTGGCTTGTATTATC   |
| CLD2_R          | AAAGACTCCACCCACTACA    |
| OCLN_F          | TCTTTGGAGGAAGCCTAAAC   |
| OCLN_R          | CTGCTCTTGGGTCTGTATATC  |
| GAPDH_F         | TTCAACGGCACAGTCAAG     |
| GAPDH_R         | CCAGTAGACTCCACGACATA   |

**Note:** XBP1s\_F/R = primers designed to amplify the spliced (mature) mRNA of XBP1.
